# Supplementary material
Source: PubMed Central journal article supplement (PMC1112057)
Supplement: jbacter_187_11_3903__1.pdf [file jbacter_187_11_3903__1.pdf]

# Supplemental file 3

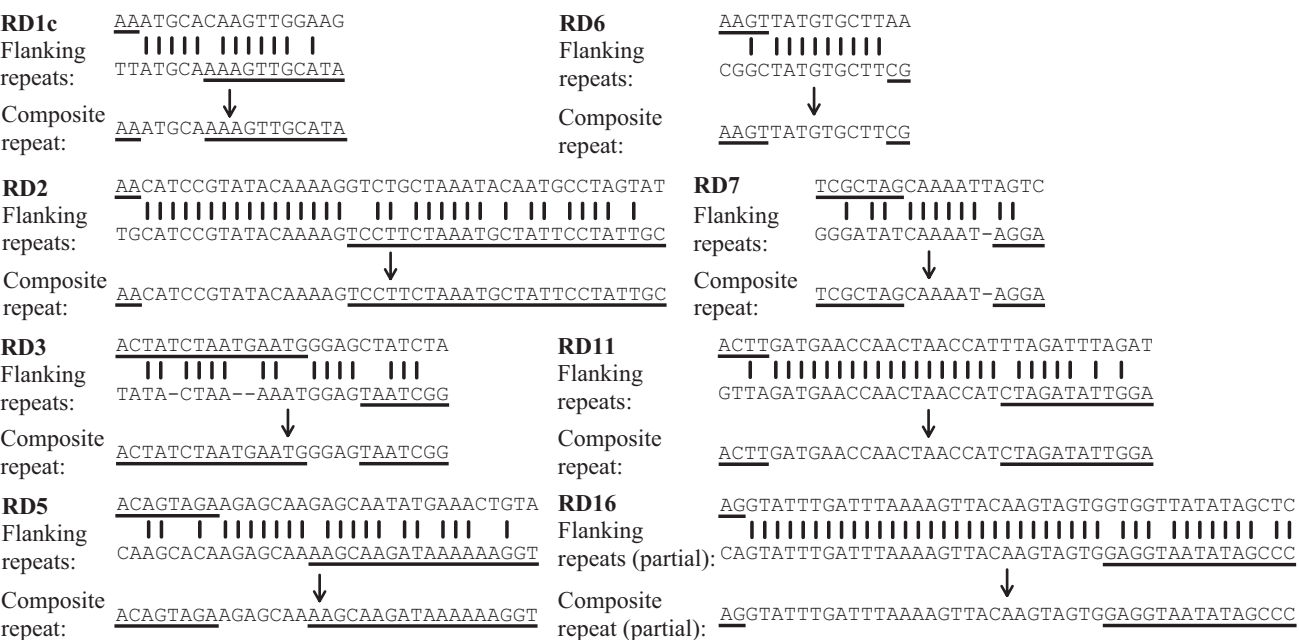

**FIGURE S1.** Alignment of direct repeated sequences that define the RDs analyzed in the present study. The arrow indicates the evolutionary direction of a deletion event. Nucleotide sequences are shown before (flanking repeats) and after (composite repeat) the deletion of intervening sequence. Flanking repeat sequences were extracted from the *F. tularensis* strain SCHU S4 genome sequence (13). Composite repeat sequences were derived from *F. tularensis* strains exhibiting deletion.

| <i>F. tularensis</i> subspecies | Isolate | Nucleotide and amino acid substitution (gene and position) |   |   |   |   |   |   |   |   |   |   |   |   |   |   |   |   |   |   |   |   |   |   |   |   |   |   |   |   |   |   |   |   |   |   |   |   |   |   |
|---------------------------------|---------|------------------------------------------------------------|---|---|---|---|---|---|---|---|---|---|---|---|---|---|---|---|---|---|---|---|---|---|---|---|---|---|---|---|---|---|---|---|---|---|---|---|---|---|
| <i>novicida</i>                 | FSC040  | C                                                          | C | A | C | C | G | G | G | C | C | C | C | C | C | C | C | C | T | T | C | G | G | C | G | C | C | C | G | T | G | T | C | T | C | G | C | A |   |   |
| <i>tularensis</i> (Type A)      | FSC041  | C                                                          | A | A | C | C | G | G | G | C | C | C | C | C | C | C | C | A | C | C | T | T | C | G | G | C | G | C | T | C | G | T | G | C | C | T | C | G | C | G |
|                                 | FSC198  | C                                                          | A | A | C | C | G | G | G | C | C | C | C | C | C | C | C | A | C | C | T | T | C | G | G | C | G | C | T | C | G | T | G | C | C | T | C | G | C | G |
|                                 | FSC237  | C                                                          | A | A | C | C | G | G | G | C | C | C | C | C | C | C | C | A | C | C | T | T | C | G | G | C | G | C | T | C | G | T | G | C | C | T | C | G | C | G |
|                                 | FSC230  | C                                                          | C | A | C | C | G | G | G | C | C | C | C | C | C | C | C | G | C | C | T | T | C | G | G | C | G | C | T | C | G | T | G | T | C | T | T | A | C | A |
|                                 | FSC054  | C                                                          | C | A | C | C | G | G | G | C | C | C | C | C | C | C | C | G | C | C | T | T | C | G | G | C | G | C | T | C | G | T | G | T | C | T | T | A | C | A |
| <i>mediasiatica</i>             | FSC147  | C                                                          | C | G | C | C | G | A | G | C | C | C | C | C | C | C | C | G | C | C | T | C | G | A | C | G | C | T | C | A | C | A | T | T | T | C | G | C | A |   |
|                                 | FSC148  | C                                                          | C | G | C | C | G | A | G | C | C | C | C | C | C | C | C | G | C | C | T | C | G | A | C | G | C | T | C | A | C | A | T | T | T | C | G | C | A |   |
| <i>holarctica</i> from Japan    | FSC021  | C                                                          | C | A | C | T | A | G | T | C | C | C | C | A | C | G | C | T | C | G | T | G | G | C | A | C | T | T | G | T | G | T | C | A | C | G | C | A |   |   |
|                                 | FSC022  | T                                                          | C | A | C | T | A | G | T | C | C | C | C | A | C | G | C | T | C | G | T | G | G | C | A | C | T | T | G | T | G | T | C | A | C | G | C | A |   |   |
| <i>holarctica</i> (Type B)      | FSC035  | C                                                          | C | A | T | T | A | G | G | T | T | T | C | A | T | G | A | T | C | G | T | T | G | T | A | A | T | T | G | T | G | T | C | A | C | G | T | A |   |   |
|                                 | FSC150  | C                                                          | C | A | T | T | A | G | G | T | T | T | C | A | T | G | A | T | C | G | T | T | G | T | A | A | C | T | G | T | G | T | C | A | C | G | T | A |   |   |
|                                 | FSC155  | C                                                          | C | A | T | T | A | G | G | T | T | T | C | A | T | G | A | T | C | G | T | T | G | T | A | A | C | T | G | T | G | T | C | A | C | G | T | A |   |   |
|                                 | FSC200  | C                                                          | C | A | T | T | A | G | G | T | T | T | C | A | T | G | A | T | C | G | T | T | G | T | A | A | C | T | G | T | G | T | C | A | C | G | T | A |   |   |
|                                 | FSC257  | C                                                          | C | A | T | T | A | G | G | T | T | T | C | A | T | G | A | T | C | G | T | T | G | T | A | A | C | T | G | T | G | T | C | A | C | G | T | A |   |   |
|                                 |         | P                                                          | → | S |   |   |   |   |   |   |   |   |   |   |   |   |   |   |   |   |   |   |   |   |   |   |   |   |   |   |   |   |   |   |   |   |   |   |   |   |
|                                 |         | L                                                          | → | I |   |   |   |   |   |   |   |   |   |   |   |   |   |   |   |   |   |   |   |   |   |   |   |   |   |   |   |   |   |   |   |   |   |   |   |   |
|                                 |         | N                                                          | → | V |   |   |   |   |   |   |   |   |   |   |   |   |   |   |   |   |   |   |   |   |   |   |   |   |   |   |   |   |   |   |   |   |   |   |   |   |
|                                 |         | A                                                          | → | V |   |   |   |   |   |   |   |   |   |   |   |   |   |   |   |   |   |   |   |   |   |   |   |   |   |   |   |   |   |   |   |   |   |   |   |   |
|                                 |         | A                                                          | → | V |   |   |   |   |   |   |   |   |   |   |   |   |   |   |   |   |   |   |   |   |   |   |   |   |   |   |   |   |   |   |   |   |   |   |   |   |
|                                 |         | G                                                          | → | R |   |   |   |   |   |   |   |   |   |   |   |   |   |   |   |   |   |   |   |   |   |   |   |   |   |   |   |   |   |   |   |   |   |   |   |   |
|                                 |         | E                                                          | → | K |   |   |   |   |   |   |   |   |   |   |   |   |   |   |   |   |   |   |   |   |   |   |   |   |   |   |   |   |   |   |   |   |   |   |   |   |
|                                 |         | A                                                          | → | S |   |   |   |   |   |   |   |   |   |   |   |   |   |   |   |   |   |   |   |   |   |   |   |   |   |   |   |   |   |   |   |   |   |   |   |   |
|                                 |         | silent                                                     |   |   |   |   |   |   |   |   |   |   |   |   |   |   |   |   |   |   |   |   |   |   |   |   |   |   |   |   |   |   |   |   |   |   |   |   |   |   |
|                                 |         | silent                                                     |   |   |   |   |   |   |   |   |   |   |   |   |   |   |   |   |   |   |   |   |   |   |   |   |   |   |   |   |   |   |   |   |   |   |   |   |   |   |
|                                 |         | silent                                                     |   |   |   |   |   |   |   |   |   |   |   |   |   |   |   |   |   |   |   |   |   |   |   |   |   |   |   |   |   |   |   |   |   |   |   |   |   |   |
|                                 |         | P                                                          | → | T |   |   |   |   |   |   |   |   |   |   |   |   |   |   |   |   |   |   |   |   |   |   |   |   |   |   |   |   |   |   |   |   |   |   |   |   |
|                                 |         | silent                                                     |   |   |   |   |   |   |   |   |   |   |   |   |   |   |   |   |   |   |   |   |   |   |   |   |   |   |   |   |   |   |   |   |   |   |   |   |   |   |
|                                 |         | G                                                          | → | S |   |   |   |   |   |   |   |   |   |   |   |   |   |   |   |   |   |   |   |   |   |   |   |   |   |   |   |   |   |   |   |   |   |   |   |   |
|                                 |         | O                                                          | → | K |   |   |   |   |   |   |   |   |   |   |   |   |   |   |   |   |   |   |   |   |   |   |   |   |   |   |   |   |   |   |   |   |   |   |   |   |
|                                 |         | A                                                          | → | V |   |   |   |   |   |   |   |   |   |   |   |   |   |   |   |   |   |   |   |   |   |   |   |   |   |   |   |   |   |   |   |   |   |   |   |   |
|                                 |         | P                                                          | → | S |   |   |   |   |   |   |   |   |   |   |   |   |   |   |   |   |   |   |   |   |   |   |   |   |   |   |   |   |   |   |   |   |   |   |   |   |
|                                 |         | S                                                          | → | R |   |   |   |   |   |   |   |   |   |   |   |   |   |   |   |   |   |   |   |   |   |   |   |   |   |   |   |   |   |   |   |   |   |   |   |   |
|                                 |         | I                                                          | → | T |   |   |   |   |   |   |   |   |   |   |   |   |   |   |   |   |   |   |   |   |   |   |   |   |   |   |   |   |   |   |   |   |   |   |   |   |
|                                 |         | D                                                          | → | Y |   |   |   |   |   |   |   |   |   |   |   |   |   |   |   |   |   |   |   |   |   |   |   |   |   |   |   |   |   |   |   |   |   |   |   |   |
|                                 |         | silent                                                     |   |   |   |   |   |   |   |   |   |   |   |   |   |   |   |   |   |   |   |   |   |   |   |   |   |   |   |   |   |   |   |   |   |   |   |   |   |   |
|                                 |         | P                                                          | → | S |   |   |   |   |   |   |   |   |   |   |   |   |   |   |   |   |   |   |   |   |   |   |   |   |   |   |   |   |   |   |   |   |   |   |   |   |
|                                 |         | silent                                                     |   |   |   |   |   |   |   |   |   |   |   |   |   |   |   |   |   |   |   |   |   |   |   |   |   |   |   |   |   |   |   |   |   |   |   |   |   |   |
|                                 |         | O                                                          | → | K |   |   |   |   |   |   |   |   |   |   |   |   |   |   |   |   |   |   |   |   |   |   |   |   |   |   |   |   |   |   |   |   |   |   |   |   |
|                                 |         | silent                                                     |   |   |   |   |   |   |   |   |   |   |   |   |   |   |   |   |   |   |   |   |   |   |   |   |   |   |   |   |   |   |   |   |   |   |   |   |   |   |
|                                 |         | silent                                                     |   |   |   |   |   |   |   |   |   |   |   |   |   |   |   |   |   |   |   |   |   |   |   |   |   |   |   |   |   |   |   |   |   |   |   |   |   |   |
|                                 |         | R                                                          | → | K |   |   |   |   |   |   |   |   |   |   |   |   |   |   |   |   |   |   |   |   |   |   |   |   |   |   |   |   |   |   |   |   |   |   |   |   |
|                                 |         | silent                                                     |   |   |   |   |   |   |   |   |   |   |   |   |   |   |   |   |   |   |   |   |   |   |   |   |   |   |   |   |   |   |   |   |   |   |   |   |   |   |
|                                 |         | D                                                          | → | N |   |   |   |   |   |   |   |   |   |   |   |   |   |   |   |   |   |   |   |   |   |   |   |   |   |   |   |   |   |   |   |   |   |   |   |   |
|                                 |         | silent                                                     |   |   |   |   |   |   |   |   |   |   |   |   |   |   |   |   |   |   |   |   |   |   |   |   |   |   |   |   |   |   |   |   |   |   |   |   |   |   |
|                                 |         | A                                                          | → | V |   |   |   |   |   |   |   |   |   |   |   |   |   |   |   |   |   |   |   |   |   |   |   |   |   |   |   |   |   |   |   |   |   |   |   |   |
|                                 |         | silent                                                     |   |   |   |   |   |   |   |   |   |   |   |   |   |   |   |   |   |   |   |   |   |   |   |   |   |   |   |   |   |   |   |   |   |   |   |   |   |   |
|                                 |         | silent                                                     |   |   |   |   |   |   |   |   |   |   |   |   |   |   |   |   |   |   |   |   |   |   |   |   |   |   |   |   |   |   |   |   |   |   |   |   |   |   |
|                                 |         | A                                                          | → | T |   |   |   |   |   |   |   |   |   |   |   |   |   |   |   |   |   |   |   |   |   |   |   |   |   |   |   |   |   |   |   |   |   |   |   |   |
|                                 |         | H                                                          | → | Y |   |   |   |   |   |   |   |   |   |   |   |   |   |   |   |   |   |   |   |   |   |   |   |   |   |   |   |   |   |   |   |   |   |   |   |   |
|                                 |         | T                                                          | → | A |   |   |   |   |   |   |   |   |   |   |   |   |   |   |   |   |   |   |   |   |   |   |   |   |   |   |   |   |   |   |   |   |   |   |   |   |

**FIGURE S2.** Single nucleotide variations in seven genes and fifteen strains of *F. tularensis*. Nucleotide variation (gray shading) and predicted amino acid substitution are indicated in reference to *F. tularensis* subsp. *novicida* (FSC040). Nucleotide sites that were unique to *F. tularensis* subsp. *novicida* (41 / 3135 base pairs) are not shown. Single nucleotide variations (37 / 3135 base pairs) of *F. tularensis* subsp. *tularensis*, *mediasiatica* and *holarctica* are shown. Nucleotide position refers to the genome of *F. tularensis* strain SCHU S4 (13).

**SNVs in seven genes.** Six SNVs divided type A isolates into two distinct groups. By showing seven unique sites, isolates of subspecies *mediasiatica* were distinct from other subspecies. Isolates from Japan showed only two unique SNVs and appeared intermediate to subspecies *tularensis* and Eurasian/North American subsp. *holarctica* isolates insofar they shared SNVs with both groups. Among Eurasian/North American subsp. *holarctica* isolates, 12 SNVs were unique to the subspecies. The single North American representative was distinct from Eurasian isolates at three sites. Two of the loci (*aroA*, *tpiA*) appeared to be under strong stabilizing selection pressure with a high proportion of synonymous nucleotide substitutions, while other loci showed many non-synonymous substitutions.
